# Supplementary material for: Effect of chemical structure on the sonochemical degradation of perfluoroalkyl and polyfluoroalkyl substances (PFASs)
Source: Royal Society of Chemistry journal article supplement (doi:10.1039/c6ew00150e), 2016-01-01
Supplement: c6ew00150e1.pdf [file c6ew00150e1.pdf]

## Supplementary Information

### Effect of chemical structure on the sonochemical degradation of perfluoroalkyl and polyfluoroalkyl substances (PFASs)

Nerea Abad Fernandez<sup>a,b</sup>, Lucia Rodriguez-Freire<sup>a,c</sup>, Manish Keswani<sup>c#</sup>,

Reyes Sierra-Alvarez<sup>a</sup>

<sup>a</sup> Department of Chemical and Environmental Engineering, The University of Arizona

P.O. Box 210011, Tucson, Arizona, USA

<sup>b</sup> Department of Chemical Engineering and Environmental Technology. EII, sede Mergelina.

Valladolid University, Valladolid, Spain

<sup>c</sup> Department of Materials Science and Engineering, The University of Arizona

P.O. Box 210012, Tucson, Arizona, USA

<sup>#</sup>Corresponding author:

Department of Materials Science and Engineering, The University of Arizona,

P.O. Box 210012, Tucson, Arizona, USA

Tel. 520-270-4361; Fax. 520-621-8059

E-mail: [manishk@email.arizona.edu](mailto:manishk@email.arizona.edu)

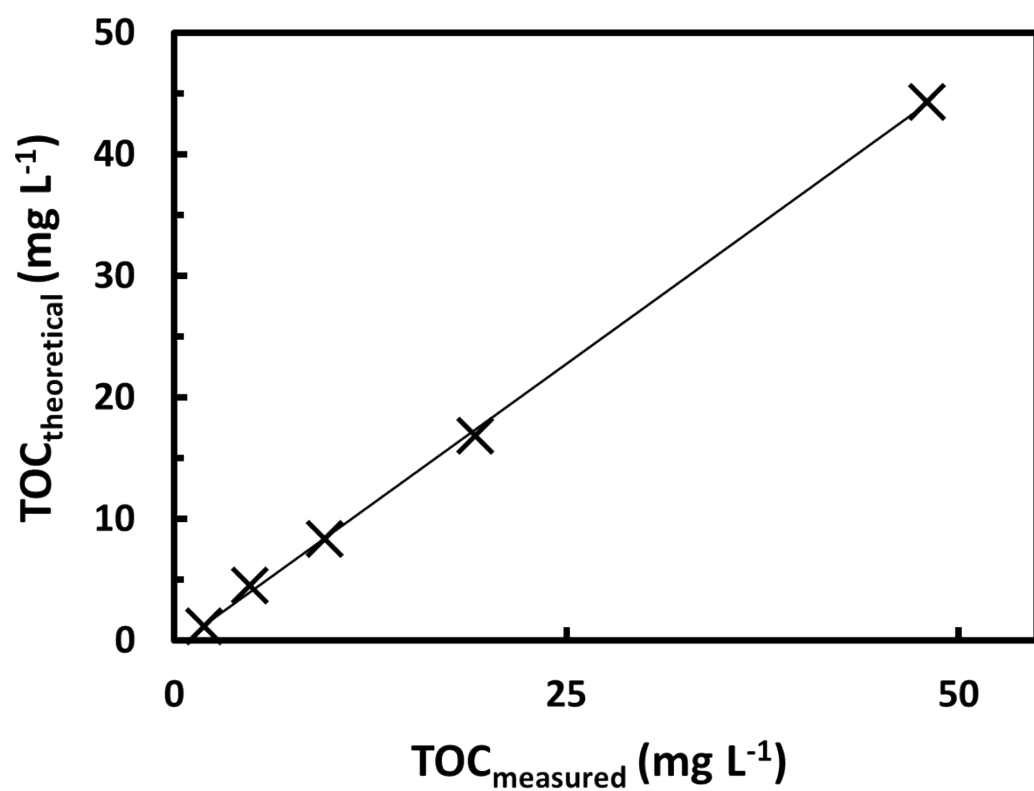

**Fig. S1.** Validation of the TOC recovery from PFOS solutions.

$$[\text{TOC}]_{\text{theoretical}} = 0.9299 \times [\text{TOC}]_{\text{measured}} - 0.5238; \text{ with R-squared} = 0.9995.$$

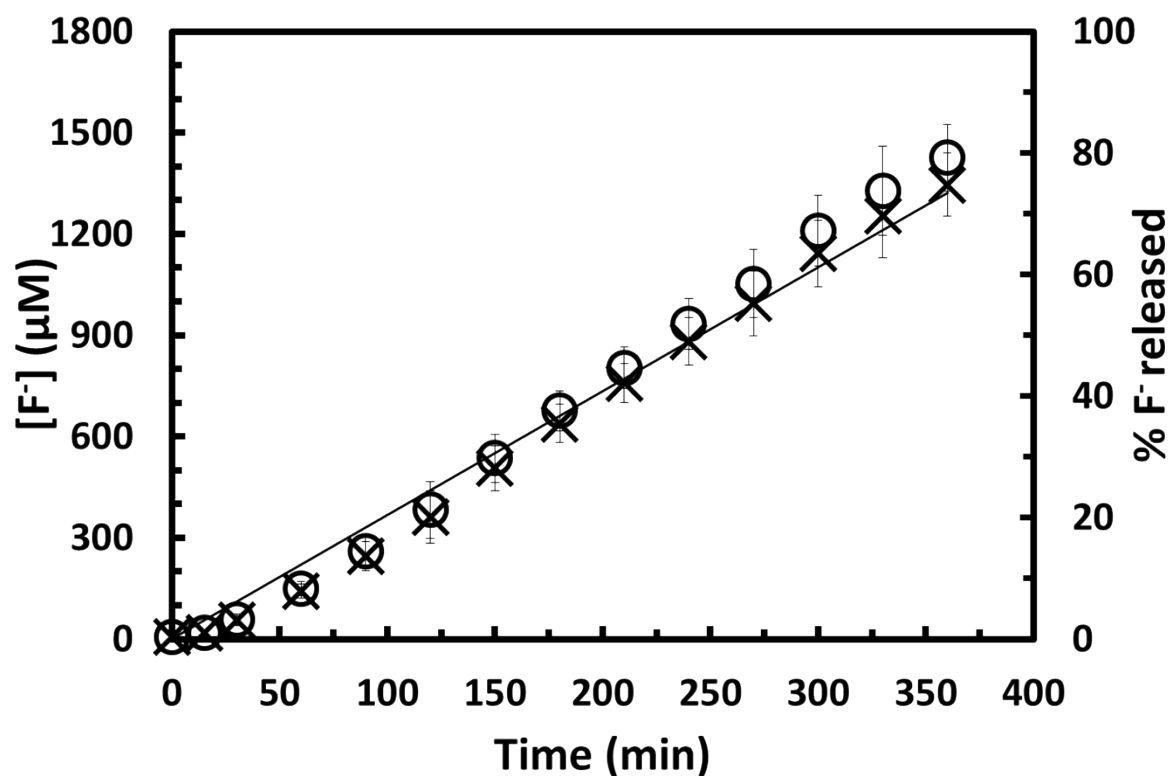

**Figure S2.** Extended degradation of 100  $\mu\text{M}$  PFOS under 500 kHz sound frequency over 360 min. Release of fluoride (x) and percentage fluoride released (o). The release of  $\text{F}^-$  followed a zero-order reaction rate with the equation (fitted line shown in the figure):  $[\text{F}^-]_t = [\text{F}^-]_0 + k \cdot t$ , where  $[\text{F}^-]_0 = 0 \mu\text{M}$  is the  $\text{F}^-$  concentration at time zero,  $k = 3.6691 \mu\text{M min}^{-1}$  is the reaction rate constant, with R-square = 0.9895.
